# Supplementary material for: Development and retrospective evaluation of a clinical decision support system for the efficient detection of drug-related problems by clinical pharmacists
Source: Research Square preprint supplement (doi:10.21203/rs.3.rs-1719228/v1), 2022-06-14
Supplement: Supplementary file 1 [file 5c9639da60ccb5fb6ae68ab2.docx]

# Electronic Supplementary Material

| **Triggers** | **DRP classification** | **DRP targeted** | **Se** | **Sp** | **PPV** | **NPV** | **Pr** |
| --- | --- | --- | --- | --- | --- | --- | --- |
| Drug | Drug–drug interaction | Anticholinergic side effects (scopolamine + glycopyrronium) | 0.0% | 100.0% | 0.0% | 99.7% | 0.32% |
| Drug | Drug–drug interaction | Decreased therapeutic effect (amiodarone + clopidogrel) | 100.0% | 99.7% | 50.0% | 100.0% | 0.32% |
| Drug | Drug–drug interaction | Decreased therapeutic effect (atorvastatin + magaldrate) | 100.0% | 100.0% | 100.0% | 100.0% | 0.32% |
| Drug | Drug–drug interaction | Decreased therapeutic effect (atorvastatin + rifampicin) | 100.0% | 100.0% | 100.0% | 100.0% | 0.32% |
| Drug | Drug–drug interaction | Decreased therapeutic effect (ciprofloxacin + magaldrate) | 100.0% | 100.0% | 100.0% | 100.0% | 0.63% |
| Drug | Drug–drug interaction | Decreased therapeutic effect (ciprofloxacin + magnesium chloride) | 50.0% | 100.0% | 100.0% | 99.7% | 0.32% |
| Drug | Drug–drug interaction | Decreased therapeutic effect (clopidogrel + ciprofloxacin) | 100.0% | 100.0% | 100.0% | 100.0% | 0.32% |
| Drug | Drug–drug interaction | Decreased therapeutic effect (clopidogrel + esomeprazole) | 66.7% | 97.0% | 18.2% | 99.7% | 0.32% |
| Drug | Drug–drug interaction | Decreased therapeutic effect (clopidogrel + nifedipine + sertraline) | 0.0% | 99.7% | 0.0% | 100.0% | 0.32% |
| Drug | Drug–drug interaction | Decreased therapeutic effect (duloxetine + metoprolol) | 100.0% | 99.7% | 50.0% | 100.0% | 0.32% |
| Drug | Drug–drug interaction | Decreased therapeutic effect (glibenclamide + amiodarone) | 100.0% | 100.0% | 100.0% | 100.0% | 0.32% |
| Drug | Adverse drug events | Decreased therapeutic effect (indacaterol + propranolol) | 100.0% | 100.0% | 100.0% | 100.0% | 0.32% |
| Drug | Drug–drug interaction | Decreased therapeutic effect (irbesartan + dexamethasone) | 100.0% | 100.0% | 100.0% | 100.0% | 0.32% |
| Drug | Drug–drug interaction | Decreased therapeutic effect (levofloxacin + human insulin) | 100.0% | 99.7% | 50.0% | 100.0% | 0.32% |
| Drug | Drug–drug interaction | Decreased therapeutic effect (levofloxacin + magnesium) | 100.0% | 99.3% | 33.3% | 100.0% | 0.32% |
| Drug | Drug–drug interaction | Decreased therapeutic effect (levofloxacin + sodium bicarbonate) | 100.0% | 100.0% | 100.0% | 100.0% | 1.90% |
| Drug | Drug–drug interaction | Decreased therapeutic effect (levothyroxine (T4) + ciprofloxacin) | 100.0% | 100.0% | 100.0% | 100.0% | 5.08% |
| Drug | Drug–drug interaction | Decreased therapeutic effect (levothyroxine (T4) + magaldrate) | 100.0% | 100.0% | 100.0% | 100.0% | 0.32% |
| Drug | Drug–drug interaction | Decreased therapeutic effect (magaldrate + allopurinol + rosuvastatin) | 100.0% | 100.0% | 100.0% | 100.0% | 0.32% |
| Drug | Drug–drug interaction | Decreased therapeutic effect (mycophenolate mofetil + esomeprazole) | 100.0% | 99.7% | 50.0% | 100.0% | 0.32% |
| Drug | Drug–drug interaction | Decreased therapeutic effect (mycophenolate mofetil + levofloxacin) | 100.0% | 100.0% | 100.0% | 100.0% | 0.32% |
| Drug | Drug–drug interaction | Decreased therapeutic effect (oxycodone + oxycodone) | 100.0% | 100.0% | 100.0% | 100.0% | 0.32% |
| Drug | Drug–drug interaction | Decreased therapeutic effect (oxycodone + venlafaxine) | 100.0% | 99.7% | 50.0% | 100.0% | 0.32% |
| Drug | Drug–drug interaction | Decreased therapeutic effect (rivaroxaban + duloxetine) | 100.0% | 99.3% | 33.3% | 100.0% | 2.86% |
| Drug | Drug–drug interaction | Decreased therapeutic effect (ticagrelor + phenobarbital) | 100.0% | 100.0% | 100.0% | 100.0% | 0.32% |
| Drug | Drug–drug interaction | Decreased therapeutic effect (tramadol + dexamethasone) | 100.0% | 100.0% | 100.0% | 100.0% | 0.32% |
| Drug | Drug–drug interaction | Decreased therapeutic effect (valproic acid + imipenem + cilastatin) | 100.0% | 100.0% | 100.0% | 100.0% | 1.59% |
| Drug | Drug–drug interaction | Decreased therapeutic effect (venlafaxine + rifampicin) | 100.0% | 100.0% | 100.0% | 100.0% | 0.63% |
| Drug | Drug–drug interaction | Decreased therapeutic effect (zolpidem + rifampicin) | 100.0% | 100.0% | 100.0% | 100.0% | 0.63% |
| Drug | Drug–drug interaction | Decreased therapeutic effect of prednisone underdose (prednisone + magaldrate) | 100.0% | 99.3% | 33.3% | 100.0% | 0.32% |
| Drug | Drug–drug interaction | Drug accumulation exposing to various side effects (acenocoumarol + citalopram) | 100.0% | 99.7% | 50.0% | 100.0% | 0.32% |
| Drug | Drug–drug interaction | Drug accumulation exposing to various side effects (acenocoumarol + sertraline) | 100.0% | 99.7% | 50.0% | 100.0% | 3.49% |
| Drug | Drug–drug interaction | Drug accumulation exposing to various side effects (acetylsalicylic acid + citalopram) | 100.0% | 99.7% | 50.0% | 100.0% | 0.95% |
| Drug | Drug–drug interaction | Drug accumulation exposing to various side effects (amlodipine + clarithromycin) | 100.0% | 99.7% | 50.0% | 100.0% | 1.59% |
| Drug | Drug–drug interaction | Drug accumulation exposing to various side effects (amlodipine + clopidogrel + esomeprazole) | 100.0% | 99.3% | 33.3% | 100.0% | 0.63% |
| Drug | Drug–drug interaction | Drug accumulation exposing to various side effects (atorvastatin + primidone + amiodarone) | 100.0% | 100.0% | 100.0% | 100.0% | 0.32% |
| Drug | Drug–drug interaction | Drug accumulation exposing to various side effects (atorvastatin + amiodarone) | 100.0% | 99.7% | 50.0% | 100.0% | 0.32% |
| Drug | Drug–drug interaction | Drug accumulation exposing to various side effects (atorvastatin) | 100.0% | 99.0% | 25.0% | 100.0% | 0.32% |
| Drug | Drug–drug interaction | Drug accumulation exposing to various side effects (cyclosporine + diltiazem) | 100.0% | 100.0% | 100.0% | 100.0% | 0.32% |
| Drug | Drug–drug interaction | Drug accumulation exposing to various side effects (clarithromycin + atorvastatin) | 100.0% | 99.3% | 33.3% | 100.0% | 0.63% |
| Drug | Drug–drug interaction | Drug accumulation exposing to various side effects (digoxin + clarithromycin) | 100.0% | 99.7% | 50.0% | 100.0% | 0.32% |
| Drug | Drug–drug interaction | Drug accumulation exposing to various side effects (escitalopram + esomeprazole) | 100.0% | 97.7% | 12.5% | 100.0% | 2.54% |
| Drug | Overprescription—duplicate therapy | Drug accumulation exposing to various side effects (indacaterol + salmeterol) | 100.0% | 100.0% | 100.0% | 100.0% | 0.32% |
| Drug | Drug–drug interaction | Drug accumulation exposing to various side effects (levofloxacin + probenecid) | 100.0% | 100.0% | 100.0% | 100.0% | 0.32% |
| Drug | Drug–drug interaction | Drug accumulation exposing to various side effects (lorazepam + verapamil) | 100.0% | 100.0% | 100.0% | 100.0% | 0.95% |
| Drug | Drug–drug interaction | Drug accumulation exposing to various side effects (methadone + tramadol) | 100.0% | 99.7% | 50.0% | 100.0% | 23.49% |
| Drug | Drug–drug interaction | Drug accumulation exposing to various side effects (metoprolol + fluoxetine) | 100.0% | 100.0% | 100.0% | 100.0% | 0.63% |
| Drug | Drug–drug interaction | Drug accumulation exposing to various side effects (paracetamol + rifampicin) | 66.7% | 100.0% | 100.0% | 99.7% | 0.32% |
| Drug | Drug–drug interaction | Drug accumulation exposing to various side effects (propranolol + metoclopramide) | 100.0% | 99.7% | 50.0% | 100.0% | 0.32% |
| Drug | Drug–drug interaction | Drug accumulation exposing to various side effects (rivaroxaban + amiodarone) | 100.0% | 99.7% | 50.0% | 100.0% | 0.32% |
| Drug | Drug–drug interaction | Drug accumulation exposing to various side effects (simvastatin + cyclosporine) | 0.0% | 100.0% | 0.0% | 99.7% | 0.32% |
| Drug | Drug–drug interaction | Drug accumulation exposing to various side effects (simvastatin + clarithromycin) | 100.0% | 99.0% | 25.0% | 100.0% | 1.90% |
| Drug | Drug–drug interaction | Drug accumulation exposing to various side effects (simvastatin + diltiazem) | 100.0% | 100.0% | 100.0% | 100.0% | 0.63% |
| Drug | Drug–drug interaction | Drug accumulation exposing to various side effects (venlafaxine + clarithromycin) | 100.0% | 100.0% | 100.0% | 100.0% | 0.32% |
| Drug | Adverse drug events | Drug accumulation exposing to various side effects (venlafaxine + trazodone) | 100.0% | 99.7% | 50.0% | 100.0% | 0.32% |
| Drug | Drug–drug interaction | Drug-induced central nervous system depression (alprazolam + flurazepam) | 100.0% | 100.0% | 100.0% | 100.0% | 0.32% |
| Drug | Drug–drug interaction | Drug-induced central nervous system depression (alprazolam + zolpidem) | 100.0% | 100.0% | 100.0% | 100.0% | 0.32% |
| Drug | Over-prescription—duplicate therapy | Drug-induced central nervous system depression (bromazepam + lorazepam) | 100.0% | 100.0% | 100.0% | 100.0% | 0.32% |
| Drug | Over-prescription—duplicate therapy | Drug-induced central nervous system depression (buprenorphine + tramadol) | 100.0% | 99.7% | 50.0% | 100.0% | 0.32% |
| Drug | Drug–drug interaction | Drug-induced central nervous system depression (clonazepam + buprenorphine + clarithromycin) | 100.0% | 100.0% | 100.0% | 100.0% | 0.63% |
| Drug | Drug–drug interaction | Drug-induced central nervous system depression (clorazepate + pregabalin + risperidone + mirtazapine) | 100.0% | 100.0% | 100.0% | 100.0% | 0.32% |
| Drug | Untreated indication/non-compliance with guidelines | Drug-induced central nervous system depression (codeine+ morphine) | 100.0% | 100.0% | 100.0% | 100.0% | 0.95% |
| Drug | Drug–drug interaction | Drug-induced central nervous system depression (codeine+ morphine) (oxazepam + flurazepam) | 100.0% | 99.7% | 50.0% | 100.0% | 0.32% |
| Drug | Drug–drug interaction | Drug-induced central nervous system depression (codeine+ morphine) (oxazepam + zolpidem) | 100.0% | 99.0% | 25.0% | 100.0% | 0.32% |
| Drug | Drug–drug interaction | Drug-induced central nervous system depression (tapentadol + tramadol) | 100.0% | 100.0% | 100.0% | 100.0% | 0.32% |
| Drug | Drug–drug interaction | Drug-induced central nervous system depression (zolpidem + morphine + mirtazapine + oxazepam) | 100.0% | 100.0% | 100.0% | 100.0% | 0.32% |
| Drug | Drug–drug interaction | Drug-induced hyperkaliemia (canagliflozin + valsartan + enoxaparin) | 100.0% | 100.0% | 100.0% | 100.0% | 0.63% |
| Drug | Drug–drug interaction | Drug-induced hypotension (clarithromycin + tamsulosin+ losartan) | 100.0% | 100.0% | 100.0% | 100.0% | 0.32% |
| Drug | Over-prescription—duplicate therapy | Drug-induced hypotension (lercanidipine + nifedipine) | 100.0% | 100.0% | 100.0% | 100.0% | 0.63% |
| Drug | Drug–drug interaction | Drug-induced lowering of epileptic threshold (paroxetine + tramadol) | 100.0% | 100.0% | 100.0% | 100.0% | 1.59% |
| Drug | Drug–drug interaction | Drug-induced lowering of epileptic threshold (tramadol + risperidone) | 100.0% | 100.0% | 100.0% | 100.0% | 0.32% |
| Drug | Adverse drug events | Drug-induced Parkinson's syndrome (biperiden + haloperidol) | 100.0% | 100.0% | 100.0% | 100.0% | 0.32% |
| Drug | Drug–drug interaction | Drug-induced Parkinson's syndrome (haloperidol + olanzapine) | 100.0% | 100.0% | 100.0% | 100.0% | 0.32% |
| Drug | Adverse drug events | Drug-induced Parkinson's syndrome (olanzapine + quetiapine) | 100.0% | 100.0% | 100.0% | 100.0% | 0.95% |
| Drug | Untreated indication/non-compliance with guidelines | Drug-induced Parkinson's syndrome (paroxetine et trazodone) | 100.0% | 100.0% | 100.0% | 100.0% | 0.32% |
| Drug | Drug–drug interaction | Drug-induced QT interval prolongation (domperidone + sulfamethoxazole+ trimethoprim) | 100.0% | 100.0% | 100.0% | 100.0% | 0.32% |
| Drug | Drug–drug interaction | Drug-induced QT interval prolongation (escitalopram + olanzapine + metoclopramide) | 100.0% | 100.0% | 100.0% | 100.0% | 0.95% |
| Drug | Drug–drug interaction | Drug-induced QT interval prolongation (hydroxychloroquine + tolterodine) | 100.0% | 100.0% | 100.0% | 100.0% | 0.32% |
| Drug | Drug–drug interaction | Drug-induced QT interval prolongation (amiodarone + haloperidol) | 100.0% | 100.0% | 100.0% | 100.0% | 0.32% |
| Drug | Drug–drug interaction | Drug-induced QT interval prolongation (amiodarone + metoprolol) | 100.0% | 98.7% | 20.0% | 100.0% | 0.32% |
| Drug | Drug–drug interaction | Drug-induced QT interval prolongation (amitriptyline + clarithromycin + haloperidol) | 100.0% | 100.0% | 100.0% | 100.0% | 0.63% |
| Drug | Drug–drug interaction | Drug-induced QT interval prolongation (ciprofloxacin + promazine + sertraline) | 100.0% | 100.0% | 100.0% | 100.0% | 0.63% |
| Drug | Drug–drug interaction | Drug-induced QT interval prolongation (citalopram + quetiapine) | 100.0% | 100.0% | 100.0% | 100.0% | 0.63% |
| Drug | Drug–drug interaction | Drug-induced QT interval prolongation (clarithromycin + citalopram) | 100.0% | 99.3% | 33.3% | 100.0% | 0.63% |
| Drug | Adverse drug events | Drug-induced QT interval prolongation (clarithromycin + duloxetine) | 100.0% | 100.0% | 100.0% | 100.0% | 0.32% |
| Drug | Drug–drug interaction | Drug-induced QT interval prolongation (clarithromycin + methadone + sulfamethoxazole + trimethoprim) | 100.0% | 100.0% | 100.0% | 100.0% | 0.32% |
| Drug | Adverse drug events | Drug-induced QT interval prolongation (clarithromycin + moxifloxacin + quetiapine) | 0.0% | 100.0% | 0.0% | 99.7% | 0.32% |
| Drug | Drug–drug interaction | Drug-induced QT interval prolongation (clotiapine + levofloxacin) | 100.0% | 100.0% | 100.0% | 100.0% | 0.32% |
| Drug | Drug–drug interaction | Drug-induced QT interval prolongation (escitalopram + domperidone + trazodone + ) | 100.0% | 100.0% | 100.0% | 100.0% | 0.32% |
| Drug | Drug–drug interaction | Drug-induced QT interval prolongation (escitalopram + quetiapine) | 100.0% | 99.3% | 33.3% | 100.0% | 0.95% |
| Drug | Drug–drug interaction | Drug-induced QT interval prolongation (methadone + fluoxetine) | 100.0% | 100.0% | 100.0% | 100.0% | 0.32% |
| Drug | Drug–drug interaction | Drug-induced QT interval prolongation (methadone + salmeterol) | 100.0% | 100.0% | 100.0% | 100.0% | 1.59% |
| Drug | Drug–drug interaction | Drug-induced QT interval prolongation (metoclopramide + domperidone) | 100.0% | 99.0% | 25.0% | 100.0% | 0.32% |
| Drug | Drug–drug interaction | Drug-induced QT interval prolongation (metoclopramide + ondansetron) | 100.0% | 98.7% | 20.0% | 100.0% | 0.32% |
| Drug | Drug–drug interaction | Drug-induced QT interval prolongation (olanzapine + fluconazole) | 100.0% | 100.0% | 100.0% | 100.0% | 0.32% |
| Drug | Drug–drug interaction | Drug-induced QT interval prolongation (ondansetron + domperidone) | 50.0% | 98.4% | 16.7% | 99.7% | 0.63% |
| Drug | Drug–drug interaction | Drug-induced QT interval prolongation (ondansetron + droperidol) | 100.0% | 99.3% | 33.3% | 100.0% | 0.32% |
| Drug | Drug–drug interaction | Drug-induced QT interval prolongation (paroxetine + trazodone + ciprofloxacin) | 100.0% | 100.0% | 100.0% | 100.0% | 1.59% |
| Drug | Drug–drug interaction | Drug-induced QT interval prolongation (ranolazine + venlafaxine + clarithromycin) | 100.0% | 100.0% | 100.0% | 100.0% | 0.32% |
| Drug | Drug–drug interaction | Drug-induced QT interval prolongation (risperidone + methadone) | 100.0% | 100.0% | 100.0% | 100.0% | 0.32% |
| Drug | Drug–drug interaction | Drug-induced QT interval prolongation (sertraline + clarithromycin) | 100.0% | 99.0% | 25.0% | 100.0% | 0.32% |
| Drug | Drug–drug interaction | Drug-induced QT interval prolongation (solifenacin + alfuzosin) | 100.0% | 100.0% | 100.0% | 100.0% | 0.32% |
| Drug | Drug–drug interaction | Drug-induced QT interval prolongation (tacrolimus + levofloxacin) | 100.0% | 100.0% | 100.0% | 100.0% | 0.32% |
| Drug | Drug–drug interaction | Drug-induced QT interval prolongation (tizanidine + domperidone) | 100.0% | 99.7% | 50.0% | 100.0% | 0.32% |
| Drug | Drug–drug interaction | Drug-induced QT interval prolongation (tolterodine + ciprofloxacin) | 100.0% | 100.0% | 100.0% | 100.0% | 0.32% |
| Drug | Drug–drug interaction | Drug-induced QT interval prolongation (venlafaxine + domperidone) | 100.0% | 100.0% | 100.0% | 100.0% | 0.32% |
| Drug | Drug–drug interaction | Drug-induced QT interval prolongation (venlafaxine + sulfamethoxazole + trimethoprim) | 100.0% | 100.0% | 100.0% | 100.0% | 0.32% |
| Drug | Drug–drug interaction | Drug-induced serotonin syndrome (metoclopramide + tramadol) | 100.0% | 99.7% | 50.0% | 100.0% | 0.63% |
| Drug | Drug–drug interaction | Drug-induced serotonin syndrome (mirtazapine + citalopram) | 100.0% | 100.0% | 100.0% | 100.0% | 0.63% |
| Drug | Drug–drug interaction | Drug-induced serotonin syndrome (tapentadol + amitriptyline) | 100.0% | 100.0% | 100.0% | 100.0% | 0.32% |
| Drug | Drug–drug interaction | Drug-induced serotonin syndrome (venlafaxine + tramadol) | 100.0% | 100.0% | 100.0% | 100.0% | 0.63% |
| Drug | Drug–drug interaction | Drug-induced serotonin syndrome (paroxetine + trazodone) | 100.0% | 100.0% | 100.0% | 100.0% | 0.95% |
| Drug | Drug–drug interaction | Drug-induced serotonin syndrome (sertraline + tramadol) | 100.0% | 100.0% | 100.0% | 100.0% | 0.32% |
| Drug | Underdosage | Inappropriate daily intake (aciclovir, local) | 100.0% | 99.7% | 50.0% | 100.0% | 0.32% |
| Drug | Overdosage | Inappropriate daily intake (clemastine) | 100.0% | 98.0% | 14.3% | 100.0% | 0.32% |
| Drug | Inappropriate time or frequency of administration | Inappropriate daily intake (dexamethasone) | 100.0% | 97.7% | 12.5% | 100.0% | 0.32% |
| Drug | Inappropriate time or frequency of administration | Inappropriate daily intake (metoprolol succinate) | 100.0% | 95.8% | 7.1% | 100.0% | 0.32% |
| Drug | Underdosage | Inappropriate daily intake (morphine) | 100.0% | 82.1% | 1.8% | 100.0% | 0.32% |
| Drug | Underdosage | Inappropriate daily intake (nicorandil) | 100.0% | 99.7% | 50.0% | 100.0% | 0.63% |
| Drug | Underdosage | Inappropriate daily intake (oxybutynin) | 100.0% | 100.0% | 100.0% | 100.0% | 5.71% |
| Drug | Inappropriate time or frequency of administration | Inappropriate daily intake (paracetamol) | 50.0% | 99.7% | 50.0% | 99.7% | 0.95% |
| Drug | Inappropriate time or frequency of administration | Inappropriate daily intake (paroxetine) | 100.0% | 100.0% | 100.0% | 100.0% | 0.32% |
| Drug | Untreated indication/non-compliance with guidelines | Inappropriate daily intake (ropinirole) | 100.0% | 100.0% | 100.0% | 100.0% | 0.32% |
| Drug | Underdosage | Inappropriate daily intake (spironolactone) | 100.0% | 99.7% | 50.0% | 100.0% | 3.17% |
| Drug | Inappropriate time or frequency of administration | Inappropriate daily intake (torasemide) | 100.0% | 97.7% | 12.5% | 100.0% | 0.32% |
| Drug | Underdosage | Inappropriate dosage (amiodarone) | 33.3% | 98.0% | 14.3% | 99.3% | 0.95% |
| Drug | Underdosage | Inappropriate dosage (amiodarone) | 33.3% | 98.0% | 14.3% | 99.3% | 0.95% |
| Drug | Inappropriate time or frequency of administration | Inappropriate dosage (betahistine) | 100.0% | 99.7% | 66.7% | 100.0% | 0.95% |
| Drug | Underdosage | Inappropriate dosage (calcitriol) | 100.0% | 100.0% | 100.0% | 100.0% | 0.32% |
| Drug | Underdosage | Inappropriate dosage (escitalopram) | 100.0% | 99.3% | 33.3% | 100.0% | 0.95% |
| Drug | Inappropriate time or frequency of administration | Inappropriate dosage (esomeprazole) | 100.0% | 92.2% | 7.7% | 100.0% | 0.32% |
| Drug | Untreated indication/non-compliance with guidelines | Inappropriate dosage (esomeprazole) | 100.0% | 92.2% | 7.7% | 100.0% | 0.32% |
| Drug | Inappropriate treatment duration | Inappropriate dosage (fosfomycin) | 100.0% | 100.0% | 100.0% | 100.0% | 0.32% |
| Drug | Underdosage | Inappropriate dosage (levetiracetam) | 100.0% | 99.7% | 50.0% | 100.0% | 0.32% |
| Drug | Inappropriate time or frequency of administration | Inappropriate dosage (metolazone) | 100.0% | 100.0% | 100.0% | 100.0% | 0.32% |
| Drug | Overdosage | Inappropriate dosage (mirtazapine) | 100.0% | 100.0% | 100.0% | 100.0% | 0.32% |
| Drug | Underdosage | Inappropriate dosage (nystatin) | 100.0% | 100.0% | 100.0% | 100.0% | 0.63% |
| Drug | Underdosage | Inappropriate dosage (oxycodone + naloxone) | 100.0% | 100.0% | 100.0% | 100.0% | 0.32% |
| Drug | Inadequate dosage for physiological state | Inappropriate dosage (paracetamol) | 33.3% | 94.8% | 5.9% | 99.3% | 0.32% |
| Drug | Inappropriate route of administration or galenic formulation | Inappropriate dosage (salmeterol) | 100.0% | 100.0% | 100.0% | 100.0% | 0.63% |
| Drug | Inappropriate time or frequency of administration | Inappropriate dosage (sertraline) | 100.0% | 100.0% | 100.0% | 100.0% | 0.32% |
| Drug | Inappropriate route of administration or galenic formulation | Inappropriate galenic form (short-acting instead of long-acting metoprolol) | 50.0% | 99.3% | 33.3% | 99.7% | 0.32% |
| Drug | Adverse drug events | Inappropriate monitoring for benefit/risk balance assessment (fluticasone) | 100.0% | 100.0% | 100.0% | 100.0% | 0.32% |
| Drug | Adverse drug events | Inappropriate monitoring for benefit/risk balance assessment (glycopyrronium + indacaterol) | 100.0% | 100.0% | 100.0% | 100.0% | 0.32% |
| Drug | Inappropriate route of administration or galenic formulation | Inappropriate route of administration (thiamine) | 66.7% | 95.8% | 53.8% | 97.5% | 0.95% |
| Drug | Untreated indication/non-compliance with guidelines | Non-compliance with guidelines (no adrenergic agonist + montelukast) | 100.0% | 99.3% | 33.3% | 100.0% | 0.32% |
| Drug | Inappropriate route of administration or galenic formulation | Parenteral administration while the oral route is available (amoxicillin + clavulanic acid) | 100.0% | 80.1% | 1.6% | 100.0% | 0.32% |
| Drug | Inappropriate route of administration or galenic formulation | Parenteral administration while the oral route is available (metoclopramide) | 100.0% | 94.4% | 10.5% | 100.0% | 0.32% |
| Drug | Inappropriate route of administration or galenic formulation | Parenteral administration while the oral route is available (morphine) | 100.0% | 89.2% | 5.7% | 100.0% | 0.32% |
| Drug | Inappropriate route of administration or galenic formulation | Parenteral administration while the oral route is available (ondansetron) | 100.0% | 97.7% | 12.5% | 100.0% | 0.32% |
| Drug | Inappropriate route of administration or galenic formulation | Parenteral administration while the oral route is available (paracetamol) | 100.0% | 92.0% | 22.6% | 100.0% | 0.32% |
| Drug | Inappropriate route of administration or galenic formulation | Parenteral administration while the oral route is available (potassium) | 0.0% | 94.5% | 0.0% | 99.7% | 0.32% |
| Drug | Untreated indication/non-compliance with guidelines | Risk of bleeding (acenocoumarol + acetylsalicylic acid) | 100.0% | 96.1% | 14.3% | 100.0% | 0.95% |
| Drug | Adverse drug events | Risk of bleeding (acenocoumarol + acetylsalicylic acid + paroxetine) | 100.0% | 100.0% | 100.0% | 100.0% | 0.32% |
| Drug | Drug–drug interaction | Risk of bleeding (acenocoumarol + acetylsalicylic acid) | 100.0% | 95.8% | 7.1% | 100.0% | 0.32% |
| Drug | Drug–drug interaction | Risk of bleeding (acetylsalicylic acid + acenocoumarol) | 100.0% | 95.8% | 7.1% | 100.0% | 0.32% |
| Drug | Drug–drug interaction | Risk of bleeding (acetylsalicylic acid + duloxetine + rivaroxaban) | 100.0% | 100.0% | 100.0% | 100.0% | 0.32% |
| Drug | Drug–drug interaction | Risk of bleeding (acetylsalicylic acid + paroxetine + enoxaparin) | 100.0% | 99.7% | 50.0% | 100.0% | 0.32% |
| Drug | Drug–drug interaction | Risk of bleeding (acetylsalicylic acid + prednisone + citalopram) | 100.0% | 100.0% | 100.0% | 100.0% | 0.32% |
| Drug | Drug–drug interaction | Risk of bleeding (apixaban + clarithromycin) | 100.0% | 100.0% | 100.0% | 100.0% | 0.32% |
| Drug | Adverse drug events | Risk of bleeding (citalopram + clopidogrel + enoxaparin) | 100.0% | 100.0% | 100.0% | 100.0% | 0.32% |
| Drug | Adverse drug events | Risk of bleeding (enoxaparin + citalopram) | 100.0% | 99.3% | 33.3% | 100.0% | 0.32% |
| Drug | Drug–drug interaction | Risk of bleeding (enoxaparin + citalopram + ibuprofen) | 100.0% | 100.0% | 100.0% | 100.0% | 0.32% |
| Drug | Drug–drug interaction | Risk of bleeding (rivaroxaban + duloxetine + nifedipine) | 100.0% | 100.0% | 100.0% | 100.0% | 3.81% |
| Drug | Drug–drug interaction | Risk of bleeding (rivaroxaban + escitalopram) | 100.0% | 100.0% | 100.0% | 100.0% | 0.32% |
| Drug | Drug–drug interaction | Risk of bleeding (rivaroxaban + ibuprofen) | 100.0% | 99.7% | 50.0% | 100.0% | 0.63% |
| Drug | Drug–drug interaction | Risk of bleeding (rivaroxaban + simvastatin) | 100.0% | 100.0% | 100.0% | 100.0% | 0.32% |
| Drug | Adverse drug events | Unfavorable benefit–risk balance (statin + fibrate) | 50.0% | 100.0% | 100.0% | 99.7% | 0.32% |
| Drug–Demographic | Inadequate dosage for physiological state | Benefit/risk balance not favorable given the age (digoxin) | 100.0% | 99.7% | 50.0% | 100.0% | 0.32% |
| Drug–Demographic | Adverse drug events | Benefit/risk balance not favorable given the age (estradiol) | 100.0% | 100.0% | 100.0% | 100.0% | 0.32% |
| Drug–Demographic | Untreated indication/non-compliance with guidelines | Benefit/risk balance not favorable given the age (hydroxyzine) | 100.0% | 100.0% | 100.0% | 100.0% | 0.63% |
| Drug–Demographic | Inadequate dosage for physiological state | Benefit/risk balance not favorable given the age (paracetamol) | 100.0% | 94.5% | 5.6% | 100.0% | 0.32% |
| Drug–Demographic | Inadequate dosage for physiological state | Benefit/risk balance not favorable given the weight (paracetamol) | 40.0% | 96.7% | 16.7% | 99.0% | 0.32% |
| Drug–Demographic | Adverse drug events | Contraindication/precaution of use (ezetimibe + simvastatin + advanced age) | 100.0% | 100.0% | 100.0% | 100.0% | 0.32% |
| Drug–Lab | Adverse drug events | Contraindication/precaution of use (amoxicillin and clavulanic acid + hepatotoxicity) | 100.0% | 94.1% | 5.3% | 100.0% | 0.32% |
| Drug–Lab | Adverse drug events | Contraindication/precaution of use (duloxetine + hyponatremia) | 100.0% | 99.7% | 50.0% | 100.0% | 0.32% |
| Drug–Lab | Adverse drug events | Contraindication/precaution of use (esomeprazole + vitamin B12 deficiency) | 50.0% | 95.8% | 7.1% | 99.7% | 0.32% |
| Drug–Lab | Underdosage | Contraindication/precaution of use (levothyroxine + high TSH levels) | 100.0% | 99.7% | 50.0% | 100.0% | 0.32% |
| Drug–Lab | Adverse drug events | Contraindication/precaution of use (montelukast + hepatotoxicity) | 100.0% | 99.3% | 33.3% | 100.0% | 0.32% |
| Drug–Lab | Adverse drug events | Contraindication/precaution of use (non-fractionated heparin + no acute renal failure) | 100.0% | 89.2% | 8.3% | 100.0% | 0.32% |
| Drug–Lab | Inadequate dosage for physiological state | Contraindication/precaution of use (paracetamol dosage not adjusted to hepatotoxicity) | 33.3% | 61.0% | 0.8% | 98.9% | 0.32% |
| Drug–Lab | Over-prescription—duplicate therapy | Contraindication/precaution of use (potassium chloride + hyperkalemia) | 66.7% | 95.1% | 11.8% | 99.7% | 0.63% |
| Drug–Lab | Over-prescription—duplicate therapy | Contraindication/precaution of use (potassium chloride + normokalemia) | 100.0% | 90.9% | 3.4% | 100.0% | 0.32% |
| Drug–Lab | Over-prescription—duplicate therapy | Contraindication/precaution of use (sodium bicarbonate + alkalosis) | 100.0% | 95.1% | 6.3% | 100.0% | 0.32% |
| Drug–Lab | Adverse drug events | Contraindication/precaution of use (tizanidine + hepatotoxicity) | 100.0% | 99.7% | 50.0% | 100.0% | 0.32% |
| Drug–Lab | Adverse drug events | Contraindication/precaution of use (torasemide + hypokalemia) | 100.0% | 81.8% | 1.8% | 100.0% | 0.32% |
| Drug–Lab | Adverse drug events | Contraindication/precaution of use (venlafaxine + hyponatremia) | 100.0% | 99.0% | 25.0% | 100.0% | 0.32% |
| Drug–Lab | Inadequate dosage for physiological state | Drug accumulation exposing to various side effects (ciprofloxacin not adjusted to renal impairment) | 100.0% | 99.3% | 33.3% | 100.0% | 0.32% |
| Drug–Lab | Inappropriate treatment duration | Drug accumulation exposing to various side effects (folic acid + supranormal blood folate levels) | 100.0% | 99.0% | 40.0% | 100.0% | 0.32% |
| Drug–Lab | Inadequate dosage for physiological state | Drug accumulation exposing to various side effects (gabapentin not adjusted to renal impairment) | 100.0% | 99.7% | 50.0% | 100.0% | 0.32% |
| Drug–Lab | Adverse drug events | Drug accumulation exposing to various side effects (ibuprofen + acute kidney failure) | 0.0% | 99.7% | 0.0% | 99.7% | 0.32% |
| Drug–Lab | Inadequate dosage for physiological state | Drug accumulation exposing to various side effects (imipenem and cilastatin not adjusted to (mild) renal impairment) | 100.0% | 96.7% | 9.1% | 100.0% | 0.32% |
| Drug–Lab | Inadequate dosage for physiological state | Drug accumulation exposing to various side effects (imipenem and cilastatin not adjusted to (severe) renal impairment) | 100.0% | 98.0% | 14.3% | 100.0% | 0.32% |
| Drug–Lab | Inadequate dosage for physiological state | Drug accumulation exposing to various side effects (losartan + acute kidney failure) | 0.0% | 99.7% | 0.0% | 99.7% | 0.32% |
| Drug–Lab | Inadequate dosage for physiological state | Drug accumulation exposing to various side effects (morphine dosage not adjusted to renal impairment) | 100.0% | 100.0% | 100.0% | 100.0% | 0.32% |
| Drug–Lab | Underdosage | Drug accumulation exposing to various side effects (parenteral amoxicillin + clavulanic acid IV not adjusted to renal impairment) | 100.0% | 100.0% | 100.0% | 100.0% | 0.32% |
| Drug–Lab | Inadequate dosage for physiological state | Drug accumulation exposing to various side effects (piperacillin and tazobactam not adjusted to renal impairment) | 100.0% | 95.1% | 6.3% | 100.0% | 0.32% |
| Drug–Lab | Inadequate dosage for physiological state | Drug accumulation exposing to various side effects (sitagliptin not adjusted to renal impairment) | 100.0% | 99.7% | 50.0% | 100.0% | 0.95% |
| Drug–Lab | Overdosage | Drug accumulation exposing to various side effects (supratherapeutic blood level of levetiracetam) | 100.0% | 100.0% | 100.0% | 100.0% | 0.63% |
| Drug–Lab | Adverse drug events | Drug accumulation exposing to various side effects (trospium + acute kidney failure) | 0.0% | 100.0% | 0.0% | 99.7% | 0.32% |
| Drug–Lab | Adverse drug events | Drug accumulation exposing to various side effects (valsartan + acute kidney failure) | 100.0% | 100.0% | 100.0% | 100.0% | 0.32% |
| Drug–Lab | Adverse drug events | Hepatic side effect (riluzole + abnormal liver biochemicals tests) | 100.0% | 100.0% | 100.0% | 100.0% | 0.32% |
| Drug–Lab | Adverse drug events | Inappropriate monitoring for benefit/risk balance assessment (amiodaron) | 100.0% | 97.4% | 11.1% | 100.0% | 0.32% |
| Drug–Lab | Inappropriate monitoring | Inappropriate monitoring for benefit/risk balance assessment (clarithromycin) | 100.0% | 92.5% | 8.0% | 100.0% | 6.67% |
| Drug–Lab | Inappropriate monitoring | Inappropriate monitoring for benefit/risk balance assessment (dapaglifozin) | 100.0% | 100.0% | 100.0% | 100.0% | 0.32% |
| Drug–Lab | Inappropriate monitoring | Inappropriate monitoring for benefit/risk balance assessment (glibenclamide) | 100.0% | 100.0% | 100.0% | 100.0% | 0.63% |
| Drug–Lab | Inappropriate monitoring | Inappropriate monitoring for benefit/risk balance assessment (gliclazide) | 100.0% | 98.7% | 33.3% | 100.0% | 0.63% |
| Drug–Lab | Inappropriate monitoring | Inappropriate monitoring for benefit/risk balance assessment (glimepiride or metformin or sitagliptin) | 66.7% | 91.4% | 32.4% | 97.8% | 0.32% |
| Drug–Lab | Inappropriate monitoring | Inappropriate monitoring for benefit/risk balance assessment (insulin aspart) | 70.0% | 86.2% | 14.6% | 98.8% | 2.22% |
| Drug–Lab | Inappropriate monitoring | Inappropriate monitoring for benefit/risk balance assessment (insulin glargine) | 33.3% | 99.7% | 50.0% | 99.3% | 0.32% |
| Drug–Lab | Inappropriate monitoring | Inappropriate monitoring for benefit/risk balance assessment (insulin protamine) | 100.0% | 96.7% | 37.5% | 100.0% | 0.32% |
| Drug–Lab | Inappropriate monitoring | Inappropriate monitoring for benefit/risk balance assessment (levothyroxine) | 100.0% | 95.4% | 6.7% | 100.0% | 0.32% |
| Drug–Lab | Inappropriate monitoring | Inappropriate monitoring for benefit/risk balance assessment (linagliptin) | 66.7% | 100.0% | 100.0% | 99.7% | 0.63% |
| Drug–Lab | Inappropriate monitoring | Inappropriate monitoring for benefit/risk balance assessment (polystyrene sulfonate) | 0.0% | 96.4% | 0.0% | 99.7% | 0.32% |
| Drug–Lab | Adverse drug events | Inappropriate monitoring for benefit/risk balance assessment (prednisone) | 100.0% | 84.3% | 5.9% | 100.0% | 0.32% |
| Drug–Lab | Adverse drug events | Inappropriate monitoring for benefit/risk balance assessment (valproic acid) | 100.0% | 98.7% | 20.0% | 100.0% | 0.32% |
| Drug–Lab | Adverse drug events | Non-compliance with guidelines (electrolytes with carbohydrates + normoglycemia) | 100.0% | 100.0% | 100.0% | 100.0% | 0.32% |
| Drug–Lab | Inadequate dosage for physiological state | Risk of bleeding (apixaban + acute kidney failure) | 100.0% | 100.0% | 100.0% | 100.0% | 0.32% |
| Drug–Lab | Inadequate dosage for physiological state | Risk of bleeding (rivaroxaban + acute kidney failure) | 100.0% | 100.0% | 100.0% | 100.0% | 0.63% |
| Drug–Lab | Untreated indication/non-compliance with guidelines | Untreated condition (no calcium carbonate with hyperphosphatemia) | 100.0% | 90.2% | 9.1% | 100.0% | 0.32% |
| Drug–Lab | Untreated indication/non-compliance with guidelines | Untreated condition (no folic acid with folate deficiency) | 0.0% | 94.1% | 0.0% | 99.7% | 0.32% |
| Drug–Lab | Untreated indication/non-compliance with guidelines | Untreated condition (no iron with iron deficiency anemia) | 100.0% | 93.2% | 4.5% | 100.0% | 0.32% |
| Drug–Lab | Untreated indication/non-compliance with guidelines | Untreated condition (no iron with iron deficiency) | 100.0% | 88.3% | 2.7% | 100.0% | 0.32% |
| Drug–Lab | Untreated indication/non-compliance with guidelines | Untreated condition (no potassium supplementation with hypokalemia) | 100.0% | 41.4% | 2.2% | 100.0% | 0.32% |
| Drug–Lab | Untreated indication/non-compliance with guidelines | Untreated condition (no vitamin D3 with hypovitaminosis D) | 27.8% | 90.0% | 14.7% | 95.3% | 0.32% |
| Drug-Problem | Adverse drug events | Anticholinergic side effects (amitriptyline + at-risk condition) | 100.0% | 100.0% | 100.0% | 100.0% | 0.32% |
| Drug-Problem | Adverse drug events | Anticholinergic side effects (darifenacin + at-risk condition) | 100.0% | 100.0% | 100.0% | 100.0% | 0.32% |
| Drug-Problem | Adverse drug events | Anticholinergic side effects (fexofenadine + at-risk condition) | 100.0% | 100.0% | 100.0% | 100.0% | 0.32% |
| Drug-Problem | Adverse drug events | Anticholinergic side effects (galantamine + at-risk condition) | 100.0% | 100.0% | 100.0% | 100.0% | 1.27% |
| Drug-Problem | Adverse drug events | Anticholinergic side effects (hydroxyzine + at-risk condition) | 100.0% | 100.0% | 100.0% | 100.0% | 5.71% |
| Drug-Problem | Adverse drug events | Anticholinergic side effects (solifenacin + at-risk condition) | 100.0% | 100.0% | 100.0% | 100.0% | 0.32% |
| Drug-Problem | Adverse drug events | Anticholinergic side effects (trospium + at-risk condition) | 100.0% | 100.0% | 100.0% | 100.0% | 0.32% |
| Drug-Problem | Adverse drug events | Central nervous system side effects (sertraline + at-risk condition) | 100.0% | 100.0% | 100.0% | 100.0% | 0.32% |
| Drug-Problem | Untreated indication/non-compliance with guidelines | Contraindication/precaution of use (acetylsalicylic acid + gastritis) | 100.0% | 99.7% | 50.0% | 100.0% | 0.32% |
| Drug-Problem | Untreated indication/non-compliance with guidelines | Contraindication/precaution of use (acetylsalicylic acid + ischemic heart disease) | 100.0% | 99.0% | 25.0% | 100.0% | 0.32% |
| Drug-Problem | Overdosage | Contraindication/precaution of use (amoxicillin and clavulanic acid dosage not adjusted to indication) | 100.0% | 99.7% | 50.0% | 100.0% | 0.32% |
| Drug-Problem | Untreated indication/non-compliance with guidelines | Contraindication/precaution of use (bromazepam or zolpidem + confusion) | 100.0% | 99.7% | 50.0% | 100.0% | 0.32% |
| Drug-Problem | Adverse drug events | Contraindication/precaution of use (cetirizine + at-risk condition) | 100.0% | 99.7% | 50.0% | 100.0% | 0.32% |
| Drug-Problem | Untreated indication/non-compliance with guidelines | Contraindication/precaution of use (clomethiazole + confusion) | 100.0% | 99.7% | 50.0% | 100.0% | 0.32% |
| Drug-Problem | Untreated indication/non-compliance with guidelines | Contraindication/precaution of use (cyproterone + at-risk condition) | 100.0% | 100.0% | 100.0% | 100.0% | 0.32% |
| Drug-Problem | Inadequate dosage for physiological state | Contraindication/precaution of use (duloxetine + at-risk condition) | 100.0% | 100.0% | 100.0% | 100.0% | 0.32% |
| Drug-Problem | Inappropriate time or frequency of administration | Contraindication/precaution of use (enalapril dosage not adjusted to indication) | 100.0% | 99.0% | 25.0% | 100.0% | 0.32% |
| Drug-Problem | Adverse drug events | Contraindication/precaution of use (ibuprofen + at-risk condition) | 100.0% | 98.0% | 14.3% | 100.0% | 1.59% |
| Drug-Problem | Untreated indication/non-compliance with guidelines | Contraindication/precaution of use (lorazepam + cognitive disorders) | 100.0% | 98.7% | 20.0% | 100.0% | 0.32% |
| Drug-Problem | Over-prescription—duplicate therapy | Contraindication/precaution of use (nitroglycerine + at-risk condition) | 100.0% | 93.2% | 4.5% | 100.0% | 0.32% |
| Drug-Problem | Untreated indication/non-compliance with guidelines | Contraindication/precaution of use (olanzapine + at-risk condition) | 100.0% | 97.7% | 12.5% | 100.0% | 0.32% |
| Drug-Problem | Inadequate dosage for physiological state | Contraindication/precaution of use (paracetamol dosage not adjusted to hepatic steatosis) | 0.0% | 99.0% | 0.0% | 99.7% | 0.32% |
| Drug-Problem | Inadequate dosage for physiological state | Contraindication/precaution of use (paracetamol dosage not adjusted to liver alcoholism) | 33.3% | 95.7% | 13.3% | 98.6% | 0.32% |
| Drug-Problem | Inadequate dosage for physiological state | Contraindication/precaution of use (paracetamol dosage not adjusted to liver cancer) | 6.3% | 97.6% | 12.5% | 95.0% | 0.32% |
| Drug-Problem | Inadequate dosage for physiological state | Contraindication/precaution of use (paracetamol dosage not adjusted to undernutrition and renal failure) | 100.0% | 100.0% | 100.0% | 100.0% | 0.32% |
| Drug-Problem | Untreated indication/non-compliance with guidelines | Contraindication/precaution of use (systemic antibiotic + viral bronchitis) | 100.0% | 86.3% | 2.3% | 100.0% | 0.32% |
| Drug-Problem | Untreated indication/non-compliance with guidelines | Contraindication/precaution of use (ticagrelor + at-risk condition) | 100.0% | 99.3% | 33.3% | 100.0% | 0.32% |
| Drug-Problem | Adverse drug events | Contraindication/precaution of use (tramadol + at-risk condition) | 100.0% | 99.7% | 50.0% | 100.0% | 0.32% |
| Drug-Problem | Adverse drug events | Contraindication/precaution of use (zolpidem + at-risk condition) | 100.0% | 99.3% | 33.3% | 100.0% | 0.32% |
| Drug-Problem | Inadequate dosage for physiological state | Drug accumulation exposing to various side effects (zolpidem dosage not adjusted to renal impairment) | 100.0% | 96.4% | 8.3% | 100.0% | 0.32% |
| Drug-Problem | Untreated indication/non-compliance with guidelines | Non-compliance with guidelines (no ACE inhibitor + ACE inhibitor indication) | 100.0% | 96.1% | 14.3% | 100.0% | 0.32% |
| Drug-Problem | Untreated indication/non-compliance with guidelines | Non-compliance with guidelines (no acetylsalicylic acid + acetylsalicylic acid indication) | 100.0% | 100.0% | 100.0% | 100.0% | 0.32% |
| Drug-Problem | Untreated indication/non-compliance with guidelines | Non-compliance with guidelines (no amiodarone + amiodarone indication) | 100.0% | 99.0% | 25.0% | 100.0% | 0.32% |
| Drug-Problem | Untreated indication/non-compliance with guidelines | Non-compliance with guidelines (no angiotensin II receptor blockers or ACE inhibitor + heart failure) | 50.0% | 94.1% | 5.3% | 99.7% | 0.32% |
| Drug-Problem | Untreated indication/non-compliance with guidelines | Non-compliance with guidelines (no angiotensin II receptor blockers or ACE inhibitor +angiotensin II receptor blockers or ACE inhibitor, except heart failure) | 66.7% | 78.0% | 2.9% | 99.6% | 0.32% |
| Drug-Problem | Untreated indication/non-compliance with guidelines | Non-compliance with guidelines (no anticoagulants + anticoagulants indication) | 100.0% | 96.1% | 7.7% | 100.0% | 0.32% |
| Drug-Problem | Untreated indication/non-compliance with guidelines | Non-compliance with guidelines (no antiretroviral + antiretroviral indication) | 100.0% | 99.0% | 25.0% | 100.0% | 0.32% |
| Drug-Problem | Untreated indication/non-compliance with guidelines | Non-compliance with guidelines (no calcium + vitamin D3 + calcium + vitamin D3 indication) | 100.0% | 100.0% | 100.0% | 100.0% | 0.32% |
| Drug-Problem | Untreated indication/non-compliance with guidelines | Non-compliance with guidelines (no fluticasone with salmeterol + fluticasone with salmeterol indication) | 100.0% | 97.7% | 12.5% | 100.0% | 0.32% |
| Drug-Problem | Untreated indication/non-compliance with guidelines | Non-compliance with guidelines (no metformin + metformin indication) | 100.0% | 87.3% | 2.5% | 100.0% | 0.32% |
| Drug-Problem | Untreated indication/non-compliance with guidelines | Non-compliance with guidelines (no metoprolol + metoprolol indication) | 100.0% | 96.7% | 9.1% | 100.0% | 0.63% |
| Drug-Problem | Untreated indication/non-compliance with guidelines | Non-compliance with guidelines (no mirtazapine + mirtazapine indication) | 100.0% | 100.0% | 100.0% | 100.0% | 0.32% |
| Drug-Problem | Untreated indication/non-compliance with guidelines | Non-compliance with guidelines (no propranolol + propranolol indication) | 100.0% | 99.3% | 33.3% | 100.0% | 0.32% |
| Drug-Problem | Untreated indication/non-compliance with guidelines | Non-compliance with guidelines (no statin + statin indication) | 75.0% | 64.5% | 7.9% | 98.5% | 0.32% |
| Drug-Problem | Untreated indication/non-compliance with guidelines | Non-compliance with guidelines (no valproic acid + valproic acid indication) | 100.0% | 99.3% | 33.3% | 100.0% | 0.32% |
| Drug-Problem | Untreated indication/non-compliance with guidelines | Non-compliance with guidelines (no vitamin B1 + vitamin B1 indication) | 50.0% | 97.7% | 12.5% | 99.7% | 0.32% |
| Drug-Problem | Over-prescription—duplicate therapy | Treatment without clear indication exposing to a side effect (acetylcysteine) | 100.0% | 100.0% | 100.0% | 100.0% | 0.63% |
| Drug-Problem | Over-prescription—duplicate therapy | Treatment without clear indication exposing to a side effect (acetylsalicylic acid) | 66.7% | 76.9% | 8.0% | 98.7% | 0.32% |
| Drug-Problem | Over-prescription—duplicate therapy | Treatment without clear indication exposing to a side effect (aciclovir) | 100.0% | 99.7% | 50.0% | 100.0% | 0.32% |
| Drug-Problem | Over-prescription—duplicate therapy | Treatment without clear indication exposing to a side effect (alendronate) | 100.0% | 99.7% | 50.0% | 100.0% | 0.32% |
| Drug-Problem | Over-prescription—duplicate therapy | Treatment without clear indication exposing to a side effect (allopurinol) | 80.0% | 98.3% | 44.4% | 99.7% | 0.32% |
| Drug-Problem | Over-prescription—duplicate therapy | Treatment without clear indication exposing to a side effect (amoxicillin + clavulanic acid) | 100.0% | 72.2% | 2.3% | 100.0% | 0.32% |
| Drug-Problem | Over-prescription—duplicate therapy | Treatment without clear indication exposing to a side effect (atorvastatin) | 100.0% | 87.9% | 5.1% | 100.0% | 0.63% |
| Drug-Problem | Over-prescription—duplicate therapy | Treatment without clear indication exposing to a side effect (betahistine) | 100.0% | 99.3% | 33.3% | 100.0% | 0.32% |
| Drug-Problem | Over-prescription—duplicate therapy | Treatment without clear indication exposing to a side effect (calcium and vitamin D3) | 100.0% | 84.7% | 2.1% | 100.0% | 0.95% |
| Drug-Problem | Over-prescription—duplicate therapy | Treatment without clear indication exposing to a side effect (calcium or vitamin D3) | 18.2% | 97.0% | 18.2% | 97.0% | 0.32% |
| Drug-Problem | Over-prescription—duplicate therapy | Treatment without clear indication exposing to a side effect (cetirizine) | 66.7% | 96.4% | 15.4% | 99.7% | 0.32% |
| Drug-Problem | Over-prescription—duplicate therapy | Treatment without clear indication exposing to a side effect (acetylpiridine) | 100.0% | 98.3% | 50.0% | 100.0% | 0.32% |
| Drug-Problem | Over-prescription—duplicate therapy | Treatment without clear indication exposing to a side effect (citalopram) | 50.0% | 97.7% | 12.5% | 99.7% | 0.32% |
| Drug-Problem | Over-prescription—duplicate therapy | Treatment without clear indication exposing to a side effect (clopidogrel) | 100.0% | 95.4% | 6.7% | 100.0% | 0.32% |
| Drug-Problem | Over-prescription—duplicate therapy | Treatment without clear indication exposing to a side effect (diltiazem) | 0.0% | 99.7% | 0.0% | 99.7% | 0.32% |
| Drug-Problem | Over-prescription—duplicate therapy | Treatment without clear indication exposing to a side effect (diltiazem) | 0.0% | 99.7% | 0.0% | 99.7% | 0.32% |
| Drug-Problem | Over-prescription—duplicate therapy | Treatment without clear indication exposing to a side effect (domperidone) | 100.0% | 90.9% | 3.4% | 100.0% | 0.32% |
| Drug-Problem | Over-prescription—duplicate therapy | Treatment without clear indication exposing to a side effect (duloxetine) | 100.0% | 99.0% | 40.0% | 100.0% | 0.32% |
| Drug-Problem | Over-prescription—duplicate therapy | Treatment without clear indication exposing to a side effect (dutasteride + tamsulosin) | 100.0% | 99.3% | 33.3% | 100.0% | 0.32% |
| Drug-Problem | Over-prescription—duplicate therapy | Treatment without clear indication exposing to a side effect (enoxaparin) | 62.5% | 58.0% | 3.8% | 98.3% | 0.32% |
| Drug-Problem | Over-prescription—duplicate therapy | Treatment without clear indication exposing to a side effect (enoxaparin) | 62.5% | 58.0% | 3.8% | 98.3% | 0.32% |
| Drug-Problem | Over-prescription—duplicate therapy | Treatment without clear indication exposing to a side effect (escitalopram) | 33.3% | 96.7% | 9.1% | 99.3% | 0.32% |
| Drug-Problem | Over-prescription—duplicate therapy | Treatment without clear indication exposing to a side effect (esomeprazole) | 73.0% | 66.2% | 40.6% | 88.6% | 0.32% |
| Drug-Problem | Over-prescription—duplicate therapy | Treatment without clear indication exposing to a side effect (estradiol + norethisterone) | 50.0% | 100.0% | 100.0% | 99.7% | 0.32% |
| Drug-Problem | Over-prescription—duplicate therapy | Treatment without clear indication exposing to a side effect (fexofenadine) | 100.0% | 100.0% | 100.0% | 100.0% | 0.32% |
| Drug-Problem | Over-prescription—duplicate therapy | Treatment without clear indication exposing to a side effect (finasteride) | 100.0% | 99.7% | 50.0% | 100.0% | 0.32% |
| Drug-Problem | Over-prescription—duplicate therapy | Treatment without clear indication exposing to a side effect (fluconazole) | 100.0% | 98.0% | 14.3% | 100.0% | 0.32% |
| Drug-Problem | Over-prescription—duplicate therapy | Treatment without clear indication exposing to a side effect (fluoxetine) | 100.0% | 99.3% | 33.3% | 100.0% | 0.32% |
| Drug-Problem | Over-prescription—duplicate therapy | Treatment without clear indication exposing to a side effect (folic acid) | 66.7% | 95.7% | 23.5% | 99.3% | 0.32% |
| Drug-Problem | Over-prescription—duplicate therapy | Treatment without clear indication exposing to a side effect (fondaparinux) | 50.0% | 93.8% | 5.0% | 99.7% | 0.32% |
| Drug-Problem | Over-prescription—duplicate therapy | Treatment without clear indication exposing to a side effect (iron supplementation) | 100.0% | 100.0% | 100.0% | 100.0% | 0.32% |
| Drug-Problem | Over-prescription—duplicate therapy | Treatment without clear indication exposing to a side effect (latanoprost) | 100.0% | 99.7% | 50.0% | 100.0% | 0.32% |
| Drug-Problem | Over-prescription—duplicate therapy | Treatment without clear indication exposing to a side effect (levetiracetam) | 100.0% | 98.4% | 16.7% | 100.0% | 0.32% |
| Drug-Problem | Over-prescription—duplicate therapy | Treatment without clear indication exposing to a side effect (levothyroxine) | 50.0% | 95.4% | 6.7% | 99.7% | 0.32% |
| Drug-Problem | Over-prescription—duplicate therapy | Treatment without clear indication exposing to a side effect (lisinopril) | 100.0% | 96.7% | 9.1% | 100.0% | 0.32% |
| Drug-Problem | Over-prescription—duplicate therapy | Treatment without clear indication exposing to a side effect (lorazepam) | 100.0% | 83.7% | 2.0% | 100.0% | 0.32% |
| Drug-Problem | Over-prescription—duplicate therapy | Treatment without clear indication exposing to a side effect (magaldrate) | 100.0% | 94.8% | 5.9% | 100.0% | 0.32% |
| Drug-Problem | Over-prescription—duplicate therapy | Treatment without clear indication exposing to a side effect (mebeverine) | 100.0% | 98.0% | 14.3% | 100.0% | 0.32% |
| Drug-Problem | Over-prescription—duplicate therapy | Treatment without clear indication exposing to a side effect (metformin) | 100.0% | 97.7% | 12.5% | 100.0% | 0.32% |
| Drug-Problem | Over-prescription—duplicate therapy | Treatment without clear indication exposing to a side effect (metoprolol) | 50.0% | 95.4% | 6.7% | 99.7% | 0.32% |
| Drug-Problem | Over-prescription—duplicate therapy | Treatment without clear indication exposing to a side effect (mirabegron) | 100.0% | 100.0% | 100.0% | 100.0% | 0.32% |
| Drug-Problem | Over-prescription—duplicate therapy | Treatment without clear indication exposing to a side effect (mirtazapine) | 40.0% | 98.3% | 28.6% | 99.0% | 0.32% |
| Drug-Problem | Over-prescription—duplicate therapy | Treatment without clear indication exposing to a side effect (nitroglycerine) | 100.0% | 93.5% | 4.8% | 100.0% | 0.32% |
| Drug-Problem | Over-prescription—duplicate therapy | Treatment without clear indication exposing to a side effect (nystatin) | 100.0% | 97.1% | 10.0% | 100.0% | 0.32% |
| Drug-Problem | Over-prescription—duplicate therapy | Treatment without clear indication exposing to a side effect (pancreatin) | 100.0% | 98.4% | 16.7% | 100.0% | 0.32% |
| Drug-Problem | Over-prescription—duplicate therapy | Treatment without clear indication exposing to a side effect (paroxetine) | 100.0% | 98.7% | 42.9% | 100.0% | 0.32% |
| Drug-Problem | Over-prescription—duplicate therapy | Treatment without clear indication exposing to a side effect (picosulfate) | 100.0% | 68.4% | 1.0% | 100.0% | 0.95% |
| Drug-Problem | Over-prescription—duplicate therapy | Treatment without clear indication exposing to a side effect (pramipexole) | 100.0% | 99.3% | 33.3% | 100.0% | 0.32% |
| Drug-Problem | Over-prescription—duplicate therapy | Treatment without clear indication exposing to a side effect (prednisone) | 100.0% | 82.1% | 1.8% | 100.0% | 0.32% |
| Drug-Problem | Over-prescription—duplicate therapy | Treatment without clear indication exposing to a side effect (pregabalin) | 100.0% | 96.7% | 16.7% | 100.0% | 0.32% |
| Drug-Problem | Over-prescription—duplicate therapy | Treatment without clear indication exposing to a side effect (primidone) | 100.0% | 100.0% | 100.0% | 100.0% | 0.32% |
| Drug-Problem | Over-prescription—duplicate therapy | Treatment without clear indication exposing to a side effect (quetiapine) | 50.0% | 96.4% | 8.3% | 99.7% | 0.32% |
| Drug-Problem | Over-prescription—duplicate therapy | Treatment without clear indication exposing to a side effect (ranitidine) | 50.0% | 99.7% | 50.0% | 99.7% | 0.32% |
| Drug-Problem | Over-prescription—duplicate therapy | Treatment without clear indication exposing to a side effect (risedronate) | 100.0% | 100.0% | 100.0% | 100.0% | 0.32% |
| Drug-Problem | Over-prescription—duplicate therapy | Treatment without clear indication exposing to a side effect (risperidone) | 100.0% | 98.7% | 20.0% | 100.0% | 0.32% |
| Drug-Problem | Over-prescription—duplicate therapy | Treatment without clear indication exposing to a side effect (salmeterol + fluticasone) | 100.0% | 91.2% | 3.6% | 100.0% | 0.32% |
| Drug-Problem | Over-prescription—duplicate therapy | Treatment without clear indication exposing to a side effect (sertraline) | 100.0% | 98.4% | 37.5% | 100.0% | 0.32% |
| Drug-Problem | Over-prescription—duplicate therapy | Treatment without clear indication exposing to a side effect (solifenacin) | 100.0% | 99.3% | 33.3% | 100.0% | 0.32% |
| Drug-Problem | Over-prescription—duplicate therapy | Treatment without clear indication exposing to a side effect (tamsulosin) | 60.0% | 97.4% | 27.3% | 99.3% | 0.32% |
| Drug-Problem | Over-prescription—duplicate therapy | Treatment without clear indication exposing to a side effect (terazosin) | 100.0% | 100.0% | 100.0% | 100.0% | 0.32% |
| Drug-Problem | Over-prescription—duplicate therapy | Treatment without clear indication exposing to a side effect (tizanidine) | 100.0% | 98.4% | 16.7% | 100.0% | 0.32% |
| Drug-Problem | Over-prescription—duplicate therapy | Treatment without clear indication exposing to a side effect (trazodone) | 100.0% | 97.7% | 12.5% | 100.0% | 0.32% |
| Drug-Problem | Over-prescription—duplicate therapy | Treatment without clear indication exposing to a side effect (valproic acid) | 100.0% | 99.0% | 40.0% | 100.0% | 0.32% |
| Drug-Problem | Over-prescription—duplicate therapy | Treatment without clear indication exposing to a side effect (venlafaxine) | 100.0% | 97.1% | 10.0% | 100.0% | 0.32% |
| Drug-Problem | Over-prescription—duplicate therapy | Treatment without clear indication exposing to a side effect (vitamin B) | 40.0% | 90.8% | 6.7% | 98.9% | 0.32% |
| Drug-Problem | Adverse drug events | Untreated condition (no metoprolol + metoprolol indication) | 100.0% | 100.0% | 100.0% | 100.0% | 0.32% |
| Drug–Vital signs | Overdosage | Benefit/risk balance not favorable given the age (high-dosage atorvastatin) | 100.0% | 99.3% | 33.3% | 100.0% | 0.32% |
| Drug–Vital signs | Adverse drug events | Contraindication/precaution of use (duloxetine and arterial hypertension) | 100.0% | 99.3% | 33.3% | 100.0% | 0.32% |
| Drug–Vital signs | Adverse drug events | Contraindication/precaution of use (oxycodone without laxatives and constipation) | 0.0% | 100.0% | 0.0% | 99.7% | 0.32% |
| Drug–Vital signs | Adverse drug events | Contraindication/precaution of use (tapentadol without laxatives and constipation) | 0.0% | 99.7% | 0.0% | 99.7% | 0.32% |
| Drug–Vital signs | Adverse drug events | Contraindication/precaution of use (tramadol without laxatives and constipation) | 33.3% | 97.0% | 10.0% | 99.3% | 0.95% |
| Drug–Vital signs | Inappropriate monitoring | Inappropriate monitoring for benefit/risk balance assessment (oxazepam) | 100.0% | 85.7% | 2.2% | 100.0% | 0.32% |
| Drug–Vital signs | Over-prescription—duplicate therapy | Treatment without clear indication exposing to a side effect (morphine) | 100.0% | 89.9% | 3.1% | 100.0% | 0.32% |
| Drug–Vital signs | Over-prescription—duplicate therapy | Treatment without clear indication exposing to a side effect (oxycodone) | 100.0% | 99.3% | 33.3% | 100.0% | 0.32% |
| Drug–Vital signs | Underdosage | Treatment without clear indication exposing to a side effect (paracetamol + codeine) | 100.0% | 99.3% | 33.3% | 100.0% | 1.27% |
| Drug–Vital signs | Over-prescription—duplicate therapy | Treatment without clear indication exposing to a side effect (paracetamol) | 100.0% | 72.3% | 1.2% | 100.0% | 0.32% |
| Drug–Vital signs | Inappropriate route of administration or galenic formulation | Untreated condition (no non-opioid or weak opioid analgesic + pain) | 100.0% | 38.4% | 0.5% | 100.0% | 0.32% |
| Complex queries | Untreated indication/non-compliance with guidelines | Contraindication/precaution of use (angiotensin II receptor blockers or ACE inhibitor + at-risk condition) | 66.7% | 83.0% | 3.7% | 99.6% | 0.95% |
| Complex queries | Adverse drug events | Contraindication/precaution of use (buprenorphine or methadone or morphine without laxatives and constipation) | 54.5% | 93.6% | 24.0% | 98.2% | 0.32% |
| Complex queries | Adverse drug events | Contraindication/precaution of use (hydromorphone + at-risk condition) | 100.0% | 100.0% | 100.0% | 100.0% | 0.32% |
| Complex queries | Adverse drug events | Contraindication/precaution of use (prednisone + at-risk condition) | 100.0% | 83.7% | 2.0% | 100.0% | 0.32% |
| Complex queries | Adverse drug events | Drug-induced central nervous system depression (clemastine + at-risk condition) | 100.0% | 100.0% | 100.0% | 100.0% | 0.32% |
| Complex queries | Inadequate dosage for physiological state | Inappropriate dosage (over-dosed digoxin + at-risk condition) | 0.0% | 99.0% | 0.0% | 99.7% | 0.63% |
| Complex queries | Inadequate dosage for physiological state | Inappropriate dosage (over-dosed paracetamol + at-risk condition) | 0.0% | 93.8% | 0.0% | 99.3% | 0.32% |
| Complex queries | Underdosage | Inappropriate dosage (under-dosed spironolactone + conditions requiring high dosage) | 66.7% | 98.0% | 25.0% | 99.7% | 0.95% |
| Complex queries | Underdosage | Inappropriate dosage (under-dosed statin + conditions requiring high dosage) | 0.0% | 98.7% | 0.0% | 99.7% | 0.32% |
| Complex queries | Inappropriate monitoring | Inappropriate monitoring for benefit/risk balance assessment (enoxaparin) | 100.0% | 96.7% | 9.1% | 100.0% | 0.32% |
| Complex queries | Untreated indication/non-compliance with guidelines | Inappropriate monitoring for benefit/risk balance assessment (lactic acid producing organisms) | 100.0% | 99.3% | 66.7% | 100.0% | 3.49% |
| Complex queries | Adverse drug events | Inappropriate monitoring for benefit/risk balance assessment (memantine) | 100.0% | 100.0% | 100.0% | 100.0% | 0.32% |
| Complex queries | Untreated indication/non-compliance with guidelines | Inappropriate monitoring for benefit/risk balance assessment (ranolazine) | 100.0% | 100.0% | 100.0% | 100.0% | 0.32% |
| Complex queries | Over-prescription—duplicate therapy | Treatment without clear indication exposing to a side effect (magnesium chloride) | 93.8% | 89.0% | 31.9% | 99.6% | 5.08% |
| Complex queries | Overdosage | Treatment without clear indication exposing to a side effect (statin at high dosage) | 100.0% | 95.8% | 7.1% | 100.0% | 0.32% |
| Complex queries | Untreated indication/non-compliance with guidelines | Untreated condition (no heparin + heparin indication) | 0.0% | 97.4% | 0.0% | 99.7% | 0.32% |
| Complex queries | Untreated indication/non-compliance with guidelines | Untreated condition (no magnesium chloride + magnesium chloride indication) | 100.0% | 97.1% | 10.0% | 100.0% | 0.32% |
| Complex queries | Untreated indication/non-compliance with guidelines | Untreated condition (no spironolactone + spironolactone indication) | 100.0% | 95.4% | 6.7% | 100.0% | 0.32% |
